# Supplementary material for: Integration of Insulin receptor/Foxo signaling and dMyc activity during muscle growth regulates body size inDrosophila
Source: Oxford University Press journal article supplement (doi:10.1242/dev.027466), 2009-02-12
Supplement: dev027466-sup-027466-tables1.pdf [file dev027466-sup-027466-tables1.pdf]

**Table S1. Genotypes analyzed in figures**

| Figure | Genotype                                                                                                                                                                                                                                                                                                                                                                                                           |
|--------|--------------------------------------------------------------------------------------------------------------------------------------------------------------------------------------------------------------------------------------------------------------------------------------------------------------------------------------------------------------------------------------------------------------------|
| 1      | +/+; <i>Wee-P26/Wee-P26</i> ; +/+<br>+/+; <i>UAS-H2B-CFP</i> +/+; <i>Dmef2-Gal4</i> +/+                                                                                                                                                                                                                                                                                                                            |
| 2      | +/+; +/+; <i>UAS-Pten</i> +/+<br>+/+; +/+; <i>Dmef2-Gal4/UAS-Pten</i><br>+/+; +/+; <i>Dmef2-Gal4</i> +/+<br>+/+; <i>UAS-InR</i> +/+; <i>Dmef2-Gal4</i> +/+<br>+/+; +/+; <i>Dmef2-Gal4/UAS-InR DN</i><br>+/+; <i>UAS-foxo</i> +/+; <i>Dmef2-Gal4</i> +/+<br>+/+; +/+; <i>Dmef2-Gal4/UAS-Tsc1, UAS-Tsc2</i><br>+/+; +/+; <i>Mhc-Gal4/UAS-Pten</i><br>+/+; <i>UAS-dmyc</i> +/+; <i>Dmef2-Gal4</i> +/+                 |
| 5      | +/+; <i>UAS-dmyc</i> +/+; <i>Dmef2-Gal4/UAS-Pten</i><br>+/+; <i>UAS-dmyc</i> +/+; <i>Dmef2-Gal4/UAS-Tsc1, UAS-Tsc2</i><br>+/+; +/+; <i>Dmef2-Gal4/UAS-dmnt</i><br>+/+; +/+; <i>Dmef2-Gal4/UAS-dmyc (tr2)</i><br>+/+; <i>UAS-foxo</i> +/+; <i>Dmef2-Gal4/UAS-dmyc (tr2)</i>                                                                                                                                         |
| 6      | <i>PG157-Gal4</i> +/+; +/+; <i>UAS-nlsGFP</i> +/+<br><i>PG157-Gal4</i> +/+; +/+; <i>UAS-nlsGFP/UAS-Pten</i><br><i>PG157-Gal4</i> +/+; +/+; <i>UAS-nlsGFP/UAS-Tsc1, UAS-Tsc2</i><br><i>PG157-Gal4</i> +/+; <i>UAS-dmyc</i> +/+; <i>UAS-nlsGFP</i> +/+<br><i>PG157-Gal4</i> +/+; <i>UAS-dmyc</i> +/+; <i>UAS-nlsGFP/UAS-Pten</i><br><i>PG157-Gal4</i> +/+; <i>UAS-dmyc</i> +/+; <i>UAS-nlsGFP/UAS-Tsc1, UAS-Tsc2</i> |
| S1     | <i>dm4IFM7,act-GFP</i> ; +/+; +/+<br><i>dm4/dm4</i> ; +/+; +/+<br>+/+; <i>chico1/CyO, act-GFP</i> ; +/+<br>+/+; <i>chico1/chico1</i> ; +/+<br>+/+; +/+; <i>Dmef2-Gal4</i> +/+<br>+/+; +/+; <i>Dmef2-Gal4/ UAS-CycE</i>                                                                                                                                                                                             |
| S2     | +/+; <i>UAS-Dcr2</i> +/+; <i>Dmef2-Gal4</i> +/+<br>+/+; <i>UAS-Dcr2/UAS-dmyc hp</i> ; <i>Dmef2-Gal4</i> +/+<br>+/+; <i>UAS-Dcr2</i> +/+; <i>Dmef2-Gal4/UAS-InR hp</i><br>+/+; <i>UAS-Dcr2</i> +/+; <i>Dmef2-Gal4/UAS-Akt1 hp</i>                                                                                                                                                                                   |
| S3     | +/+; +/+; <i>Dmef2-Gal4, UAS-dsRed</i> +/+<br>+/+; +/+; <i>Mhc-Gal4/UAS-dsRed</i>                                                                                                                                                                                                                                                                                                                                  |
| S4     | +/+; <i>UAS-dmyc</i> +/+; <i>Dmef2-Gal4, UAS-dsRed</i> +/+                                                                                                                                                                                                                                                                                                                                                         |
| S8     | +/+; +/+; <i>Dmef2-Gal4/UAS-Akt1 hp</i>                                                                                                                                                                                                                                                                                                                                                                            |

*tr2* refers to second transgene.
